# Supplementary material
Source: PubMed Central journal article supplement (PMC3646937)

## Parekh *et al.*, Supplementary materials

### Supplemental Figure Legends

**Supplemental Figure 1.** T cell-specific deletion of Vps34. (A) Genomic DNA PCR of the Vps34 wild-type and mutant alleles in Vps34<sup>fl/fl</sup>;CD4-Cre or Vps34<sup>fl/+</sup>;CD4-Cre mice. (B) cDNA was prepared from CD4<sup>+</sup> thymocytes or plate-bound anti-CD3 and anti-CD28 antibody-activated splenic CD4<sup>+</sup> or CD8<sup>+</sup> T cells derived from Vps34<sup>fl/fl</sup>;CD4-Cre or Vps34<sup>fl/+</sup>;CD4-Cre mice and the expression of Vps34 RNA was measured by real-time PCR assay. Data for an average of 4 individual mice is shown. (C) Cell lysates were prepared from total T cells from Vps34<sup>fl/fl</sup>;CD4-Cre or Vps34<sup>fl/+</sup>;CD4-Cre mice activated with plate-bound anti-CD3 and anti-CD28 antibodies for 36 hrs, followed by immunoblotting with anti-Vps34 or - $\beta$ -actin antibody. A representative experiment of 3 individual experiments representing 4-6 mice is shown.

**Supplemental Figure 2.** Organ cellularity in T cell-specific Vps34-deficient mice. (A) Splenic, lymph node, liver or thymic mononuclear cells were prepared from Vps34<sup>fl/fl</sup>;CD4-Cre or Vps34<sup>fl/+</sup>;CD4-Cre mice and the total number of cells was counted. A summary of the absolute number of cells obtained from individual mice from 5-6 mice in each group is shown. \*p<0.05. (B) Summary of results obtained in Fig. 4 A,B.

**Supplemental Figure 3.** Dendritic cells, B cells,  $\gamma\delta$  T cells and NK cells in T cell-specific Vps34-deficient mice. Mononuclear cells were prepared from spleen, lymph nodes, liver and thymus derived from Vps34<sup>fl/fl</sup>;CD4-Cre or Vps34<sup>fl/+</sup>;CD4-Cre mice. (A) Cells were stained with anti-TCR $\beta$ , -NK1.1 and -B220 antibodies. The gated cells shown in the plots are TCR $\beta$ <sup>-</sup>NK1.1<sup>+</sup> NK cells. A summary of the frequency of NK cells and their absolute numbers calculated based on the organ cellularity with 5-6 mice analyzed in each group is shown to the right. \*p<0.05. (B) Cells were stained with anti-TCR $\beta$  and -TCR $\gamma\delta$  antibodies. The gated cells shown in the plots are TCR $\beta$ <sup>-</sup>TCR $\gamma\delta$ <sup>+</sup> T cells. A summary of the frequency of  $\gamma\delta$  T cells and their absolute numbers calculated based on the organ cellularity with 5-6 mice analyzed in each group is shown to the right. \*p<0.05. (C) Cells were stained with anti-CD11b and -CD11c antibodies. A summary of the frequency of DCs and their absolute numbers calculated based on the organ cellularity with

5-6 mice analyzed in each group is shown to the right. \* $p < 0.05$ . (D) Cells were stained with anti-B220 antibodies. A summary of the frequency of B cells and their absolute numbers calculated based on the organ cellularity with 5-6 mice analyzed in each group is shown to the right. \* $p < 0.05$ .

**Supplemental Figure 4. Inflammatory lesions in the small intestine and colons of aged T cell-specific Vps34-deficient mice and in Rag2<sup>-/-</sup> mice with colitis induced following adoptive transfer of CD4<sup>+</sup>CD25<sup>-</sup> cells.** (A) Small intestinal sections from aged Vps34<sup>f/f</sup>;CD4-Cre or Vps34<sup>f/+</sup>;CD4-Cre mice were stained with H&E. A representative section from two mice depicting a large lymphoid follicle in the small intestine of T cell-specific Vps34-deficient mice is shown. (scale bar = 100  $\mu$ m). (B) Colon sections of results depicted in Fig. 7E. Three representative pictures in each group are shown. (C) Splenic mononuclear cells from 6- to 8-week-old mice were prepared and  $2 \times 10^5$  cells were activated with PMA and ionomycin (ION+PMA) in the presence of GolgiPlug<sup>TM</sup> to allow intracellular accumulation of cytokines. Cells were then harvested and surface-stained with anti-CD4 and -CD8 antibodies, followed by intracellular staining with anti-IL-17A and anti-IFN- $\gamma$  antibodies, or with anti-IL-13 and anti-IFN- $\gamma$  antibodies. The data shown are gated on CD4<sup>+</sup> or CD8<sup>+</sup> T cells. Results shown are representative of 3 individual experiments.

# Supplemental Figure 1

**A**

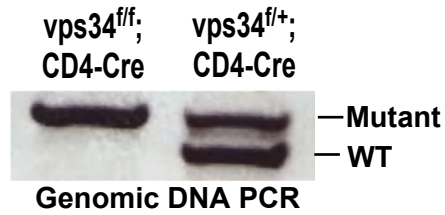

**B**

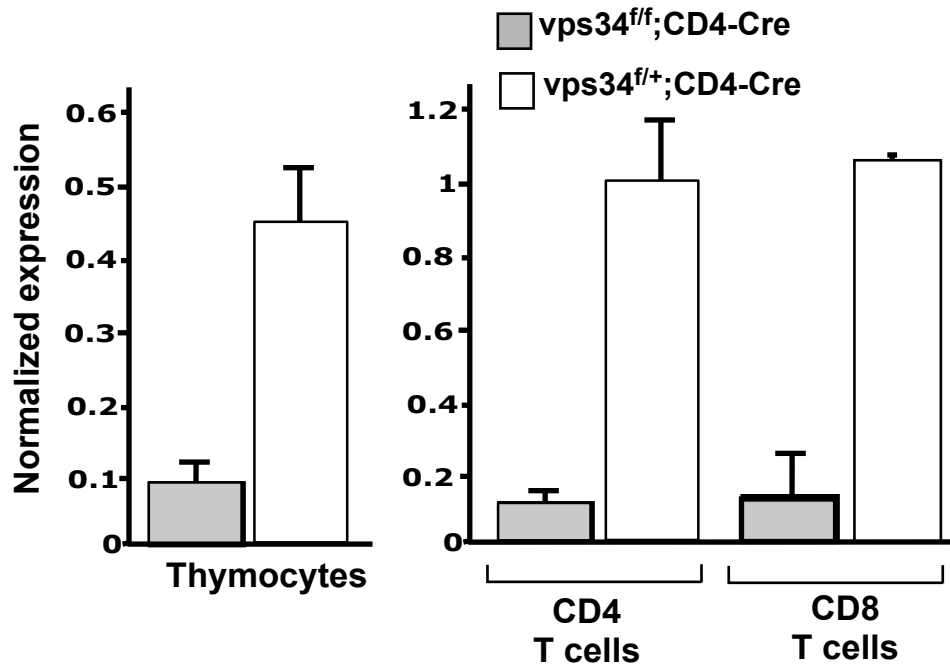

**C**

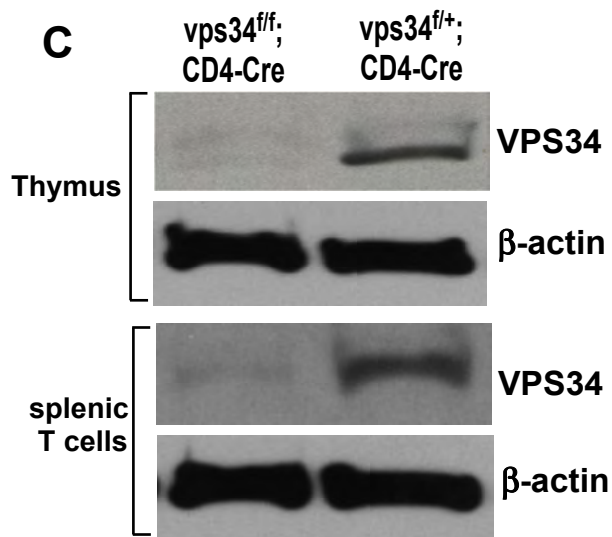

# Supplemental Figure 2

**A**

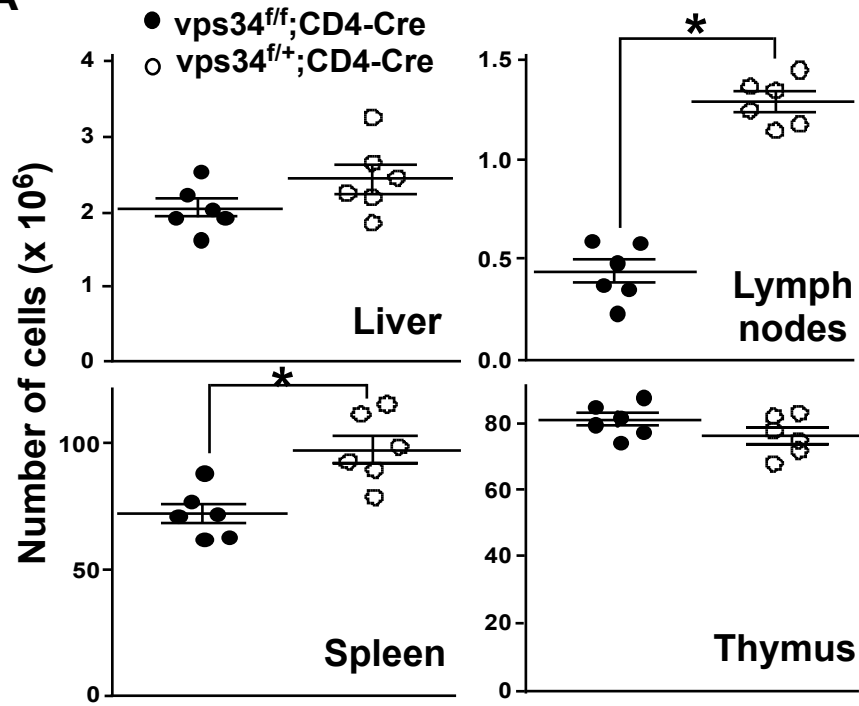

**B**

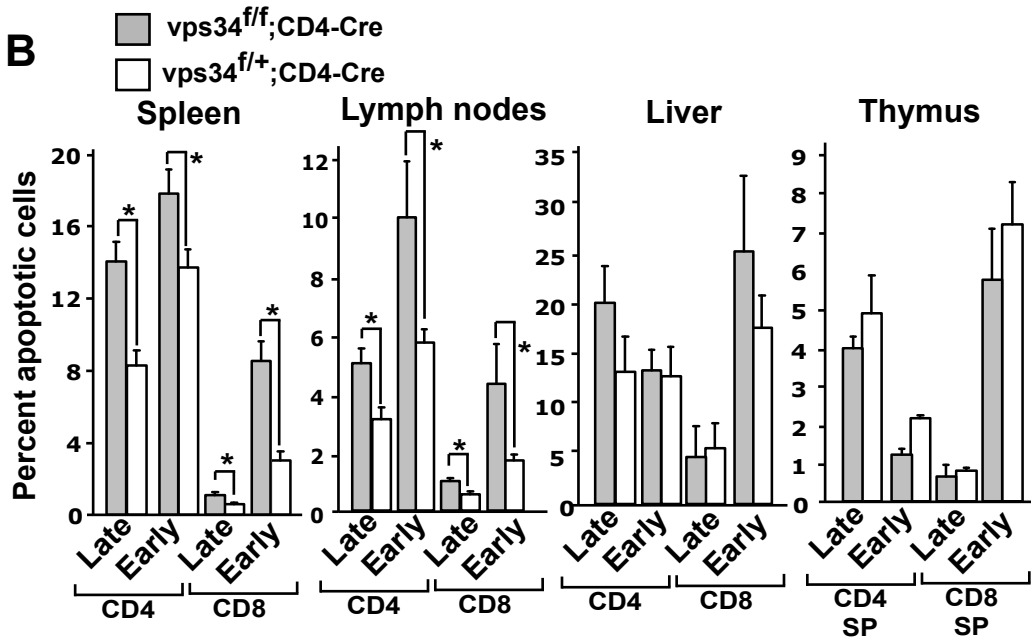

# Supplemental Figure 3

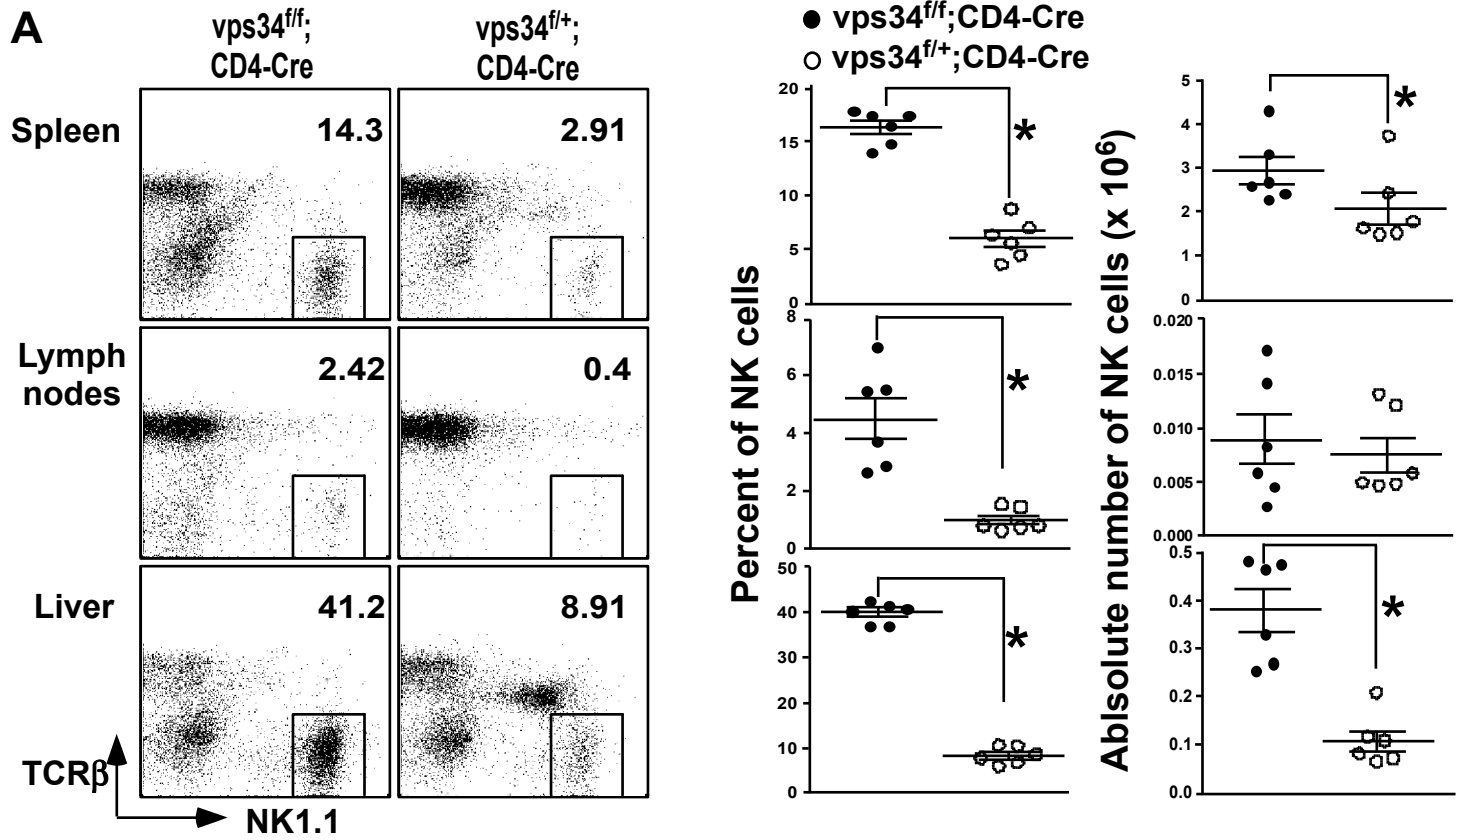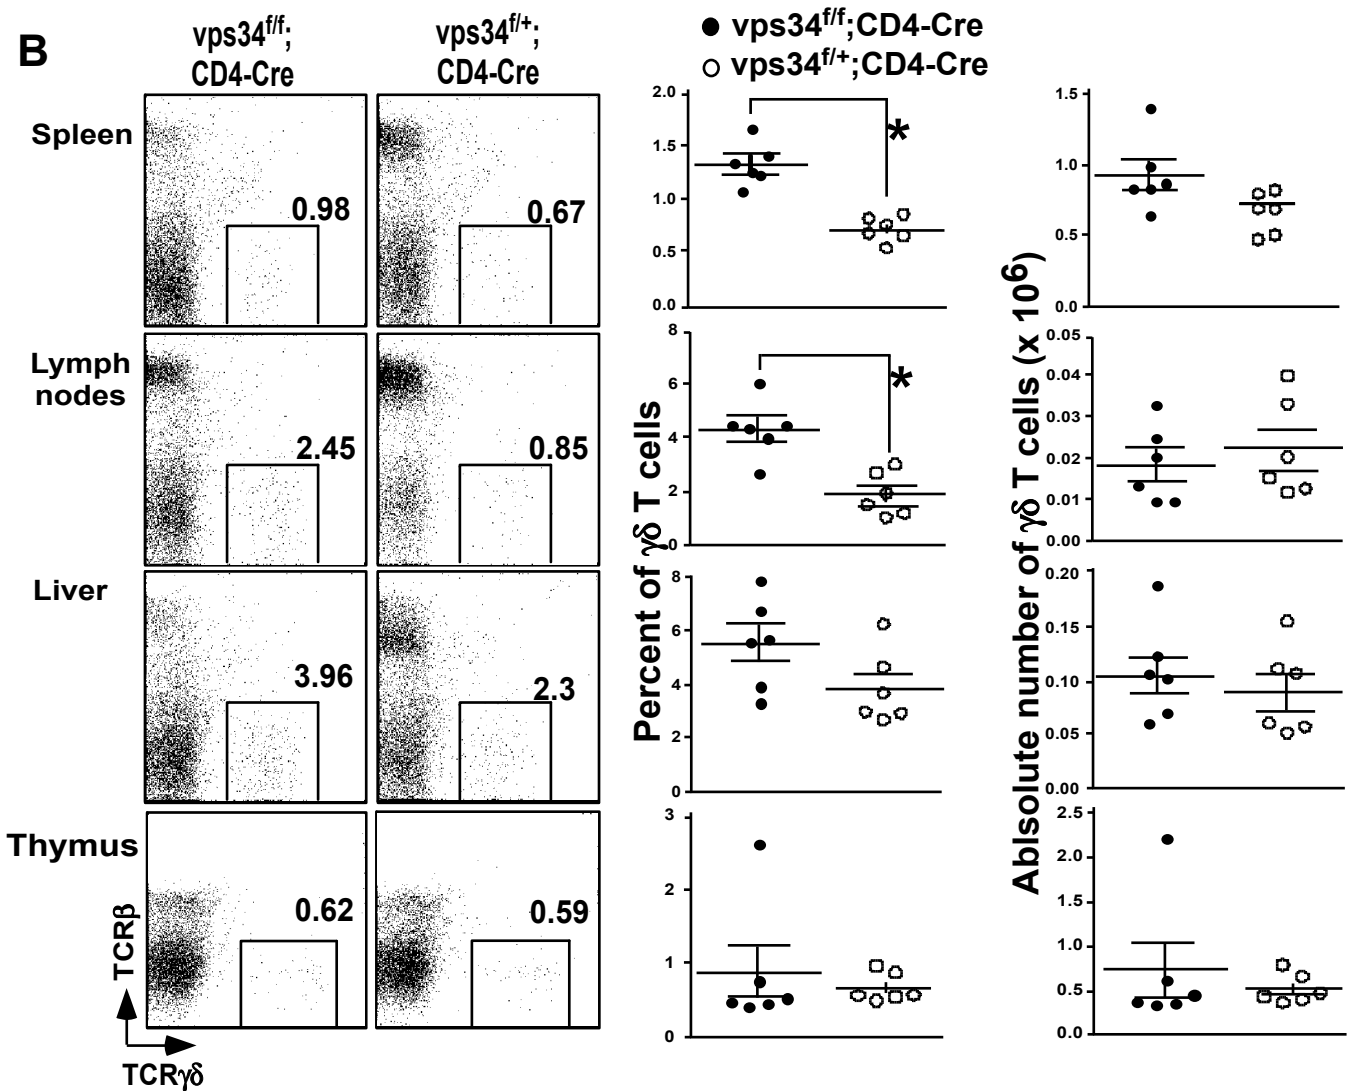

# Supplemental Figure 3

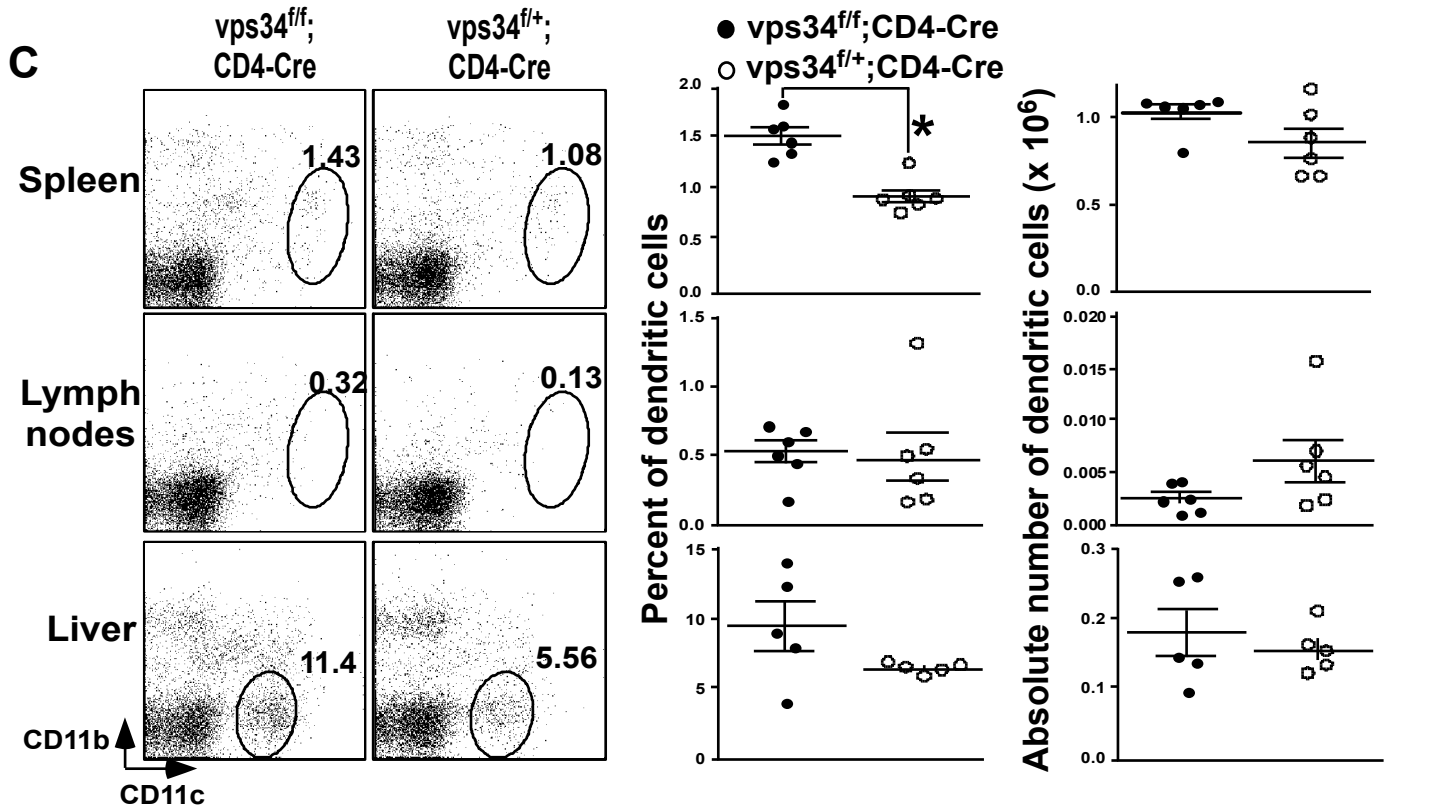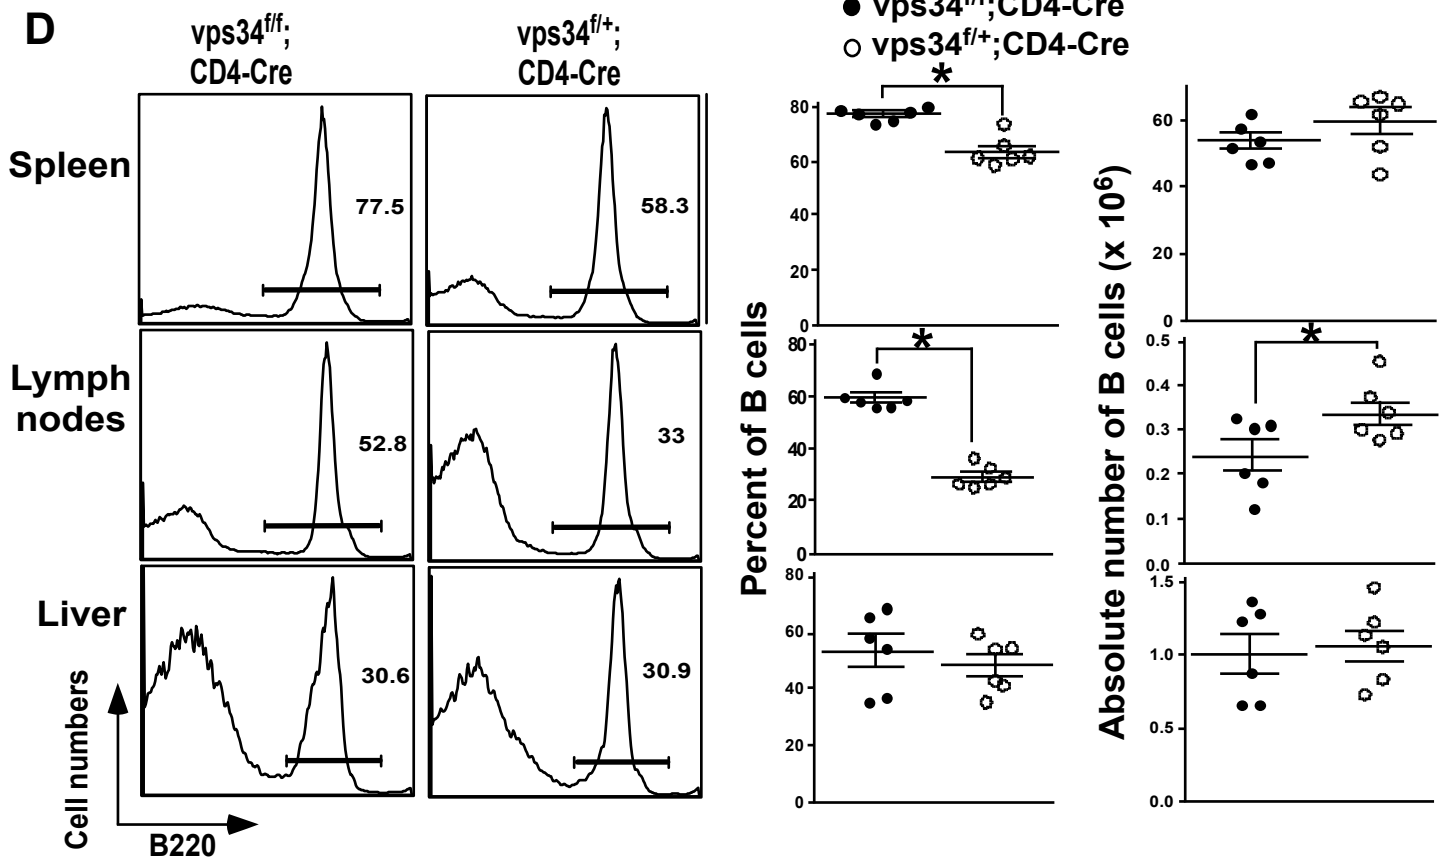

# Supplemental Figure 4

**A**

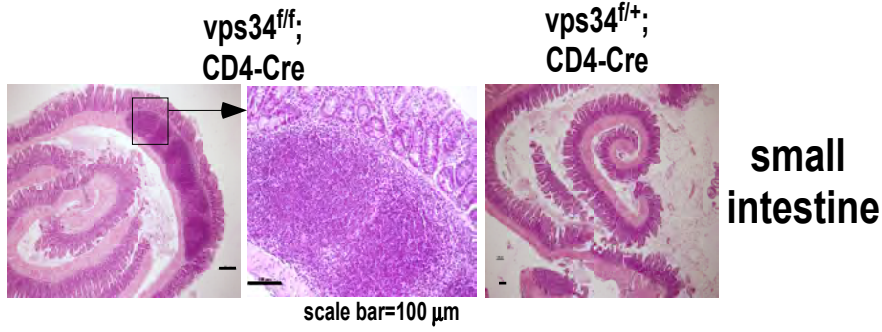

**B**

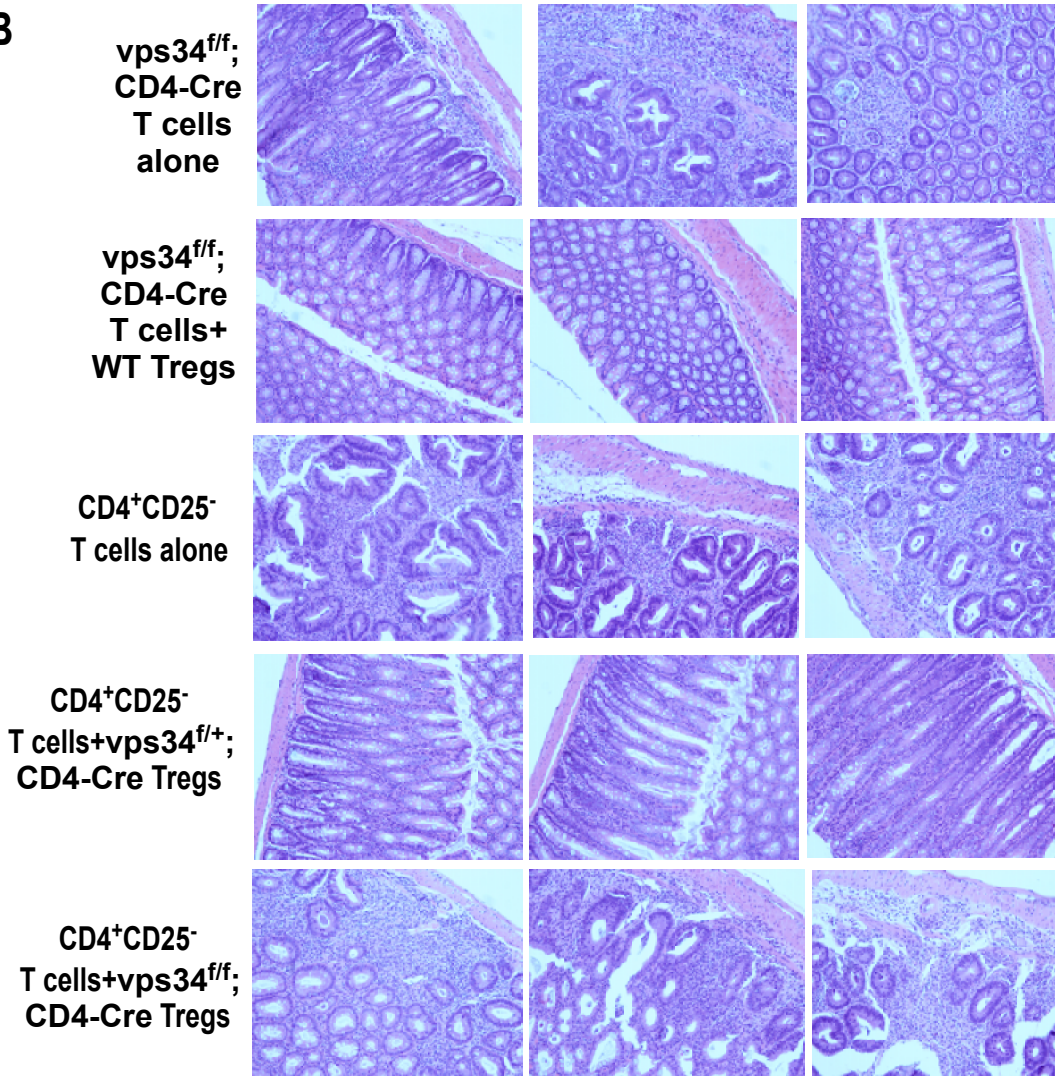

**C**

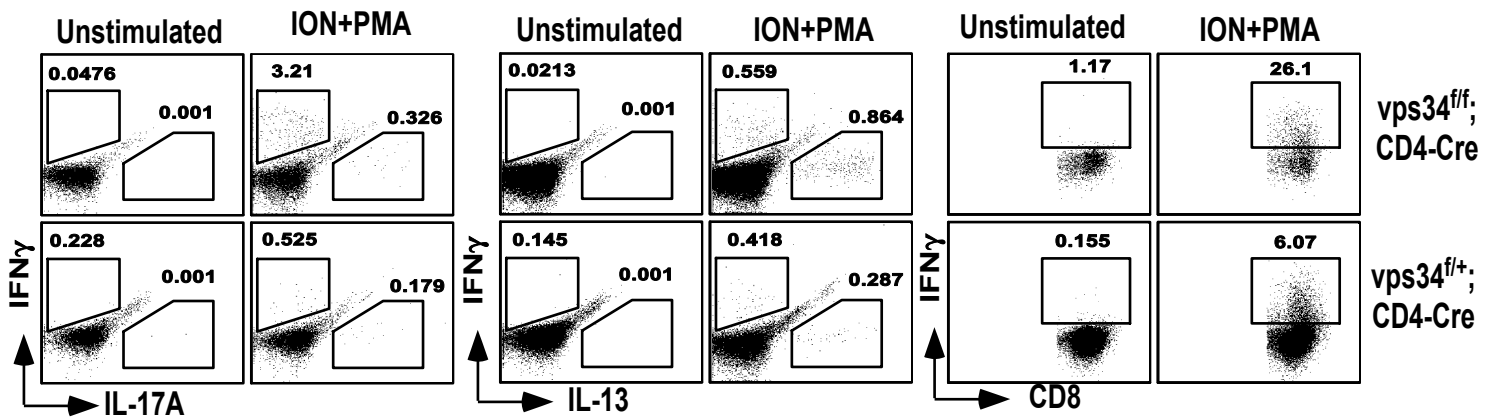

Supplement: NIHMS459377-supplement-1.pdf [file NIHMS459377-supplement-1.pdf]
